# Supplementary material for: A systematic review of Machine Learning and Deep Learning approaches in Mexico: challenges and opportunities
Source: Front Artif Intell. 2025 Jan 7;7:1479855. doi: 10.3389/frai.2024.1479855 (PMC11753225; doi:10.3389/frai.2024.1479855)
Supplement: Supplementary file 1 [file Table_1.XLSX]

## Sheet: Full-text elegibility checklist
Authors	Title	Journal	Publisher	Volume	Issue	URL	Year	Criteria			Included in the review
								I	II	III
Arias-Rodriguez L.F.; Duan Z.; Sepúlveda R.; Martinez-martinez S.; Disse M.	Monitoring Water Quality of Valle de Bravo Reservoir, Mexico, Using Entire Lifespan of MERIS Data and Machine Learning Approaches	Remote Sensing	MDPI	12	10	https://www.mdpi.com/2072-4292/12/10/1586	2020	✓	✓	✓	Yes
Ahmad M.; Rappenglück B.; Osibanjo O.O.; Retama A.	A machine learning approach to investigate the build-up of surface ozone in Mexico-City	Journal of Cleaner Production	ELSEVIER	379		https://www.sciencedirect.com/science/article/abs/pii/S095965262204210X	2022	✓	✓	✓	Yes
Almustafa M.	Covid19-Mexican-Patients’ Dataset (Covid19MPD) Classification and Prediction Using Feature Importance		WILEY	34	4	https://onlinelibrary.wiley.com/doi/10.1002/cpe.6675	2021	✓	✓	✓	Yes
Alvarado-Iniesta A.; García-Alcaraz J.L.; Piña-monarrez M.; Pérez-Domínguez L.	Multiobjective optimization of torch brazing process by a hybrid of fuzzy logic and multiobjective artificial bee colony algorithm	Journal of Intelligent Manufacturing	Springer	27		https://link.springer.com/article/10.1007/s10845-014-0899-2	2016	✓	✕	✓	No
Arellano-Verdejo J.; Lazcano-Hernández H.E.	Collective view: mapping Sargassum distribution along beaches	PeerJ Computer Science	PeerJ	7		https://peerj.com/articles/cs-528/	2021	✓	✓	✓	Yes
Argueta-Santillan M.; Campos-Castolo E.M.; Méndez-Lucero M.A.; Lima-Sánchez D.N.; Urbina-González J.F.; Cerón-Solís O.; Alayola-Sansores A.; Fajardo-Dolci G.	Use of artificial intelligence to evaluate the detection of retinal alterations as a screening test in Mexican patients	International Journal of Combinatorial Optimization Problems and Informatics	EDITADA	12	3	https://ijcopi.org/ojs/article/view/229	2021	✓	✓	✓	Yes
Avila-Perez H.; Flores-Munguía E.J.; Rosas-Acevedo J.L.; Gallardo-Bernal I.; Ramirez-delReal T.A.	Comparative Analysis of Water Quality Applying Statistic and Machine Learning Method: A Case Study in Coyuca Lagoon and Tecpan River, Mexico	Water	MDPI	15	4	https://www.mdpi.com/2073-4441/15/4/640	2023	✓	✓	✓	Yes
Ávila-Solís P.B.; González-Camacho J.M.; Vargas-Chanes D.; Pérez-Rodríguez P.	Prediction of social lag in Mexico: a machine learning approach from economic unit data. Agrocienci	Agrociencia	COLPOS	56	2	https://agrociencia-colpos.org/index.php/agrociencia/article/view/2768	2022	✓	✓	✓	Yes
Baak-Baak C.M.; Cigarroa-Toledo N.; Pinto-Castillo J.F.; Cetina-Trejo R.C.; Torres-Chable O.; Blitvich B.B.; Garcia-Rejon J.E.	Cluster Analysis of Dengue Morbidity and Mortality in Mexico from 2007 to 2020: Implications for the Probable Case Definition	American Journal of Tropical Medicine and Hygiene	American Society of Tropical Medicine and Hygiene	106	5	https://pubmed.ncbi.nlm.nih.gov/35292593/	2022	✓	✓	✓	Yes
Barreda-Luna A.A.; Rodríguez-Reséndiz J.; Rodríguez-Abreo O.; Álvarez-Alvarado J.M.	Spatial Models and Neural Network for Identifying Sustainable Transportation Projects with Study Case in Querétaro, an Intermediate Mexican City	Sustainability	MDPI	14	13	https://www.mdpi.com/2071-1050/14/13/7796	2022	✓	✓	✓	Yes
Barreras A.; Alanís de la Rosa J.A.; Mayorga R.; Cuenca R.; Moregon-G C.; Godínez C.; Delgado C.; Soriano-Luna M.A.; George S.; Aldrete-Leal M.I.; Medina S.; Romero J.; Villela S.; Lister A.; Sheridan R.; Flores R.; Crowfter T.W.; Guevara M.	Spatial predictions of tree density and tree height across Mexico forests using ensemble learning and forest inventory data	Water	WILEY	13	5	https://onlinelibrary.wiley.com/doi/10.1002/ece3.10090	2023	✓	✓	✓	Yes
Becerra-Rico J.; Aceves-Fernández M.A.; Esquivel-Escalante K.E.; Pedraza-Ortega J.C.	Airborne particle pollution predictive model using Gated Recurrent Unit (GRU) deep neural networks	Earth Science Informatics	Springer	13		https://link.springer.com/article/10.1007/s12145-020-00462-9	2020	✓	✓	✓	Yes
Becerra-Sánchez A.; Rodarte-Rodríguez A.; Escalante-García N.I.; Olvera-González J.E.; De la Rosa-Vargas J.I.; Zepeda-Valles G.; Velásquez-Martínez E.J.	Mortality Analysis of Patients with COVID-19 in Mexico Based on Risk Factors Applying Machine Learning Techniques	Diagnostics	MDPI	12	6	https://www.mdpi.com/2075-4418/12/6/1396	2022	✓	✓	✓	Yes
Bello-Valle A.S.; Martínez-Rebollar A.; Dánchez W.; Estrada-Esquivel H.	A Predictive Model for Automatic Detection of Loneliness and Social Isolation using Machine Learning	Computación y Sistemas	Instituto Politécnico Nacional, Centro de Investigación en Computación	26	1	https://www.scielo.org.mx/scielo.php?script=sci_arttext&pid=S1405-55462022000100113	2022	✓	✓	✓	Yes
Campos-Ferreira U.E.; González-Camacho J.M.	Convolutional Neural Network classifier for identifying diseases of avocado fruit (Persea americana Mill.) from digital images	Agrociencia	COLPOS	55	8	https://dialnet.unirioja.es/servlet/articulo?codigo=8216812	2021	✓	✓	✓	Yes
Carmona J.M.; Gupta P.; Lozano-García D.F.; Vanoye A.Y.; Hernández-Paniagua I.Y.; Mendoza A.	Evaluation of MODIS Aerosol Optical Depth and Surface Data Using an Ensemble Modeling Approach to Assess PM2.5 Temporal and Spatial Distributions	Remote Sensing	MDPI	13	16	https://www.mdpi.com/2072-4292/13/16/3102	2021	✓	✓	✓	Yes
Carrillo-Vega M.F.; Pérez-Zepeda M.U.; Salinas-Escudero G.; García-Peña C.; Reyes-Ramírez E.D.; Espinel-Bermúdez M.C.; Sánchez-García S.; Parra-Rodríguez L.	Patterns of Muscle-Related Risk Factors for Sarcopenia in Older Mexican Women	International Journal of Environmental Research and Public Health	MDPI	19	16	https://www.mdpi.com/1660-4601/19/16/10239	2022	✓	✓	✓	Yes
Castillo-Olea C.; García-Zapirain Soto B.; Carballo-Lozano C.; Zuñiga C.	Automatic Classification of Sarcopenia Level in Older Adults: A Case Study at Tijuana General Hospital	International Journal of Environmental Research and Public Health	MDPI	16	18	https://www.mdpi.com/1660-4601/16/18/3275	2019	✓	✓	✓	Yes
Castillo-Olea C.; García-Zapirain Soto B.; Zuñiga C.	Evaluation of Prevalence of the Sarcopenia Level Using Machine Learning Techniques: Case Study in Tijuana Baja California, Mexico	International Journal of Environmental Research and Public Health	MDPI	17	6	https://www.mdpi.com/1660-4601/17/6/1917	2020	✓	✓	✓	Yes
Castillo-Olea C.; Conte-Galván R.; Zuñiga C.; Siono A.; Huerta A.; Bardhi O.; Ortíz E.	Early Stage Identification of COVID-19 Patients in Mexico Using Machine Learning: A Case Study for the Tijuana General Hospital	Information	MDPI	12	12	https://www.mdpi.com/2078-2489/12/12/490	2021	✓	✓	✓	Yes
Castorera C.M.; Abundez I.M.; Alejo R.; Granda-Gutiérrez E.E.; Rendón E.; Villegas O.	Deep Neural Network for Gender-Based Violence Detection on Twitter Messages	Mathematics	MDPI	9	8	https://www.mdpi.com/2227-7390/9/8/807	2021	✓	✓	✓	Yes
Chadaga K.; Prabhu S.; Umakanth S.; Bhat K.V.; Sampathila N.; Chadaga P.R.; Prakasha K.K.	COVID-19 Mortality Prediction among Patients Using Epidemiological Parameters: An Ensemble Machine Learning Approach	Engineered Science	Engineered Science	16		https://www.espublisher.com/journals/articledetails/579/	2021	✓	✓	✓	Yes
Contreras-Hernández S.; Tzili-Cruz M.P.; Espínola-Sánchez J.M.; Pérez-Tzili A.	Deep Learning Model for COVID‐19 Sentiment Analysis on Twitter	New Generation Computing	Springer	41		https://link.springer.com/article/10.1007/s00354-023-00209-2	2023	✓	✓	✓	Yes
Contreras-Navarro E.; García-Cueto O.R.; González-Navarro F.F.; Valenzuela-Palacios E.A.	Modeling Air Temperatures at 850 milibars: An Indicator Potential of Heatwaves in Northwest Mexico	Información Tecnológica	Centro de Información Tecnológica of La Serena	27	2	https://www.scielo.cl/scielo.php?script=sci_arttext&pid=S0718-07642016000200017&lng=en&nrm=iso&tlng=en	2016	✓	✓	✓	Yes
Coria S.R.; Gay-García C.; Villers-Ruiz L.; Guzmán-Arenas A.; Sánchez-Meneses O.; Ávila-Barrón O.R.; Pérez-Meza M.; Cruz-Núñez X.; Martínez-Luna G.L.	Climate patterns of political division units obtained using automatic classification trees	Atmósfera	Instituto de Ciencias de la Atmósfera y Cambio Climático	29	4	https://www.revistascca.unam.mx/atm/index.php/atm/article/view/ATM.2016.29.04.06	2016	✓	✓	✓	Yes
Corona A.	Crisis in Mexico: the effect of the president’s discourse on state-level government communication about Covid-19 on Twitter	Media & Jornalismo	Center for Research Media & Journalism	22	40	https://impactum-journals.uc.pt/mj/article/view/10287	2022	✓	✓	✓	Yes
Couturier S.; Galeana-Pizaña J.M.; Figueroa D.; Osorno-Covarrubias J.; Jiménez A.D.	The link between agriculture and rural food security in the ecoregions of Mexico: path diagrams and underlying dataset	Data in Brief	ELSEVIER	44		https://www.sciencedirect.com/science/article/pii/S2352340922007508	2022	✕	✕	✕	No
Cruz-López M.I.; Manzo-Delgado L.L.; Aguirre-Gómez R.; Chuvieco E.; Equihua-Benítez J.A.	Spatial Distribution of Forest Fire Emissions: A Case Study in Three Mexican Ecoregions	Remote Sensing	MDPI	11	10	https://www.mdpi.com/2072-4292/11/10/1185	2019	✓	✓	✓	Yes
Cruz-May E.; Bassam A.; Ricalde L.J., Escalante-Soberanis M.A.; Oubram O.; May-Tzuc O.; Alanis A.Y.; Livas-García A.	Global sensitivity analysis for a real-time electricity market forecast by a machine learning approach: A case study of Mexico	International Journal of Electrical Power and Energy Systems	ELSEVIER	135		https://www.sciencedirect.com/science/article/abs/pii/S0142061521007444	2022	✓	✓	✓	Yes
Cuaya-Simbro G.; Hernández-Vera I.; Ruiz E.; Gutiérrez-Fragoso K.	Automatic Tariff Classification System using Deep Learning	International Journal of Advanced Computer Science and Applications	The Science and Information Organization	13	7	https://thesai.org/Publications/ViewPaper?Volume=13&Issue=7&Code=IJACSA&SerialNo=105	2022	✓	✓	✓	Yes
Delgado-Gallegos J.L.; Avilés-Rodriguez G.; Padilla-Rivas G.R.; Cosío-León M.A.; Franco-Villareal H.; Nieto-Hipólito J.I.; Sánchez-López J.D.; Zuñiga-Violante E.; Islas J.F.; Romo-Cardenas G.S.	Application of C5.0 Algorithm for the Assessment of Perceived Stress in Healthcare Professionals Attending COVID-19	Brain Sciences	MDPI	13	3	https://www.mdpi.com/2076-3425/13/3/513	2023	✓	✓	✓	Yes
Díaz-Martínez M.A.; Román-Salinas R.V.; Santiago-Santiago A.D.; Mejía-Barrios C.; Zárate-Cruz R.	Industry 4.0 and digitization towards job satisfaction of organizations in Tampico, Tamaulipas, Mexico	Revista De Métodos Cuantitativos Para La Economía Y La Empresa	Universidad Pablo de Olavide Sevilla	30		https://www.upo.es/revistas/index.php/RevMetCuant/article/view/3992	2020	✕	✕	✓	No
Dobler-Morales C.; Lorenzen M.; Orozco-Ramírez Q.; Bocco G.	Beyond a generalized deagrarianization: Livelihood heterogeneity and its determinants in the Mixteca Alta, Mexico	World Development	ELSEVIER	16		https://www.sciencedirect.com/science/article/abs/pii/S0305750X22002649?via%3Dihub	2022	✓	✓	✓	Yes
Fernández del Castillo A.; Yebra-Montes C.; Verduzco-Garibay M.; De Anda J.; Garcia-Gonzalez A.; Gradilla-Hernández M.S.	Simple Prediction of an Ecosystem-Specific Water Quality Index and the Water Quality Classification of a Highly Polluted River through Supervised Machine Learning	Water	MDPI	14	8	https://www.mdpi.com/2073-4441/14/8/1235	2022	✓	✓	✓	Yes
Gallardo‐Rincón H., et al. 2023	MIDO GDM: an innovative artificial intelligence-based prediction model for the development of gestational diabetes in Mexican women	Scientific Reports	Nature	13		https://www.nature.com/articles/s41598-023-34126-7	2023	✓	✓	✓	Yes
Gao Y.; Solórzano J.V.; Estoque R.C.; Tsuyuzaki S.	Tropical Dry Forest Dynamics Explained by Topographic and Anthropogenic Factors: A Case Study in Mexico	Remote Sensing	MDPI	15	5	https://www.mdpi.com/2072-4292/15/5/1471	2023	✓	✓	✓	Yes
Gasperín-Rodríguez E.I.; Gómez-Figueroa J.A.; Gómez-Miranda L.M.; Ríos-Gallardo P.T.; Palmeros-Exsome C.; Hernández-Lepe M.A.; Moncada-Jiménez J.; Bonilla D.A.	Body Composition Profiles of Applicants to a Physical Education and Sports Major in Southeastern Mexico	International Journal of Environmental Research and Public Health	MDPI	19	23	https://www.mdpi.com/1660-4601/19/23/15685	2022	✓	✓	✓	Yes
Gómez D.; Salvador P.; Sanz J.; Casanova J.L.	Regional estimation of garlic yield using crop, satellite and climate data in Mexico	Computers and Electronics in Agriculture	ELSEVIER	181		https://www.sciencedirect.com/science/article/abs/pii/S0168169920331483	2021	✓	✓	✓	Yes
Gómez D.; Salvador P.; Sanz J.; Casanova J.L.	Modelling wheat yield with antecedent information, satellite and climate data using machine learning methods in Mexico	Agricultural and Forest Meteorology	ELSEVIER	300		https://www.sciencedirect.com/science/article/abs/pii/S0168192320304196	2021	✓	✓	✓	Yes
Gomez-Cravioto D.A.; Diaz-Ramos R.E.; Cantu-Ortiz F.J.; Ceballos H.G.	Data Analysis and Forecasting of the COVID‐19 Spread: A Comparison of Recurrent Neural Networks and Time Series Models	Cognitive Computation	Springer			https://link.springer.com/article/10.1007/s12559-021-09885-y	2021	✓	✓	✓	Yes
Gómez-Flores W.; Garza-Saldaña J.J.; Varela-Fuentes S.E.	A Huanglongbing Detection Method for Orange Trees Based on Deep Neural Networks and Transfer Learning	IEEE Access	IEEE	10		https://ieeexplore.ieee.org/document/9938991	2022	✓	✓	✓	Yes
Gónzalez-Bandala D.A.; Cuevas-Tello J.C.; Noyola D.E.; Comas-García A.; García-Sepúlveda C.A.	Computational Forecasting Methodology for Acute Respiratory Infectious Disease Dynamics	International Journal of Environmental Research and Public Health	MDPI	17	12	https://www.mdpi.com/1660-4601/17/12/4540	2020	✓	✓	✓	Yes
González-Briceño G.; Sánchez A.; Ortega-Cisneros S.; García-Contreras M.S.; Pinedo-Diaz G.A.; Moya-Sánchez E.U.	Artificial Intelligence-Based Referral System for Patients With Diabetic Retinopathy	Computer	IEEE	53	10	https://ieeexplore.ieee.org/document/9206433	2020	✓	✓	✓	Yes
González-Rossano C.; Terán-Bustamante A.; Velázquez-Salazar M.; Martínez-Velasco A.	What Drives Profit Income in Mexico’s Main Banks? Evidence Using Machine Learning	Sustainability	MDPI	15	7	https://www.mdpi.com/2071-1050/15/7/5696	2023	✓	✓	✓	Yes
Guevara-Escobar A.; González-Sosa E.; Cervantes-Jiménez M.; Suzán-Azpiri H.; Queijeiro-Bolaños M.E.; Carrillo-Ángeles I.; Cambrón-Sandoval V.H.	Machine learning estimates of eddy covariance carbon flux in a scrub in the Mexican highland	Biogeosciences	Copernicus	18	2	https://bg.copernicus.org/articles/18/367/2021/	2021	✓	✕	✓	No
Gutiéttez G.; Canul-Reich J.	Mining: Students Comments about Teacher Performance Assessment using Machine Learning Algorithms	International Journal of Combinatorial Optimization Problems and Informatics	EDITADA	9	3	https://ijcopi.org/ojs/article/view/99/90	2018	✓	✓	✓	Yes
Gutiérrez-Avila I.; Arfer K.B.; Carrión D.; Rush J.; Kloog I.; Naeger A.R.; Grutter M.; Páramos-Figueroa V.H.; Riojas-Rodrígue H.; Just A.C.	Prediction of daily mean and one-hour maximum PM2.5 concentrations and applications in Central Mexico using satellite-based machine-learning models	Journal of Exposure Science & Environmental Epidemiology	Nature	32		https://www.nature.com/articles/s41370-022-00471-4	2022	✓	✓	✓	Yes
Gutiérrez-Esparza G.O.; Vallejo-Allende M.; Hernández-Torruco J.	Classification of Cyber-Aggression Cases Applying Machine Learning	Applied Sciences	MDPI	9	9	https://www.mdpi.com/2076-3417/9/9/1828	2019	✓	✓	✓	Yes
Gutiérrez-Esparza G.O.; Infante-Vázquez O.; Vallejo-Allende M.; Hernández-Torruco J.	Prediction of Metabolic Syndrome in a Mexican Population Applying Machine Learning Algorithms	Symmetry	MDPI	12	4	https://www.mdpi.com/2073-8994/12/4/581	2020	✓	✓	✓	Yes
Gutiérrez-Esparza G.O.; Ramírez-delReal T.; Martínez-García M.; Infante-Vázquez O.; Vallejo-Allende M.; Hernández-Torruco J.	Machine and Deep Learning Applied to Predict Metabolic Syndrome without a Blood Screening	Applied Sciences	MDPI	11	10	https://www.mdpi.com/2076-3417/11/10/4334	2021	✓	✓	✓	Yes
Espinosa-Guzmán A.A.; May-Tzuc O.; Balam-Pantí I.; Reyes-Trujeque J.; Pérez-Quintana I.V.; Bassam A.	Artificial Neural Network modeling of PM10 and PM2.5 in a tropical climate region: San Francisco de Campeche, Mexico	Química Nova	PubliSBQ	40	9	https://s3.sa-east-1.amazonaws.com/static.sites.sbq.org.br/quimicanova.sbq.org.br/pdf/AR20170124.pdf	2017	✓	✓	✓	Yes
Guzmán-Torres J.A.; Alonso-Guzmán E.M.; Domínguez-Mota F.; Tinoco-Guerrero G.	Estimation of the main conditions in (SARS-CoV-2) Covid-19 patients that increase the risk of death using Machine learning, the case of Mexico	Results in Physics	ELSEVIER	27		https://www.sciencedirect.com/science/article/pii/S2211379721005969	2021	✓	✓	✓	Yes
Hartman S.; Farfán M.; Hoogesteger J.; D'Odorico P.	Mapping the expansion of berry greenhouses onto Michoacán’s ejido lands, México	Environmental Research Letters	IOP Publishing	17		https://iopscience.iop.org/article/10.1088/1748-9326/ac9ac8	2022	✓	✓	✓	Yes
Hernández-Moreno M.M.; Téllez-Valdés O.; Martínez-Meyer E.; Islas-Saldaña L.A.; Salazar-Rojas V.M.; Macías-Cuéllar H.	Vegetation cover and land use distribution in the Municipality of Zapotitlán, Puebla, Mexico	Revista Mexicna de Biodiversidad	Instituto de Biología UNAM	92		https://revista.ib.unam.mx/index.php/bio/article/view/3649	2021	✓	✓	✓	Yes
Huang J.; Alanís-Martínez I.; Kumagai L.; Dai Z.; Zheng Z.; Pérez de León A.A.; Chen J.; Deng X.	Machine learning and analysis of genomic diversity of “Candidatus Liberibacter asiaticus” strains from 20 citrus production states in Mexico	Frontiers in Plant Science	Frontiers	13		https://www.frontiersin.org/articles/10.3389/fpls.2022.1052680/full	2022	✓	✓	✓	Yes
Ibargüengoytia-González P.H.; Reyes-Ballesteros A.; Borunda-Pacheco M.; García-López U.A.	Prediction of Wind Power Generation with Modern Artificial Intelli- gence Technology	Journal of Autonomous Intelligence	Frontier Sceintific Publishing	4	2	https://jai.front-sci.com/index.php/jai/article/view/501	2021	✓	✓	✓	Yes
Illoldi-Rangel P.; Fuller T.; Linaje M.; Pappas C.; Sánchez-Cordero V.; Sarkar S.	Solving the maximum representation problem to prioritize areas for the conservation of terrestrial mammals at risk in Oaxaca	Diversity and Distributions	WILEY	14	3	https://onlinelibrary.wiley.com/doi/10.1111/j.1472-4642.2007.00458.x	2008	✓	✓	✓	Yes
Kampichler C.; Calmé S.; Weissenberger H.; Arriaga-Weiss S.L.	Indication of a species in an extinction vortex: The ocellated turkey on the Yucatan peninsula, Mexico	Acta Oecologica	ELSEVIER	36	6	https://www.sciencedirect.com/science/article/abs/pii/S1146609X10000883	2010	✓	✓	✓	Yes
Knappett P.S.K et al.	Rising arsenic concentrations from dewatering a geothermally influenced aquifer in central Mexico	Water Research	ELSEVIER	185		https://www.sciencedirect.com/science/article/abs/pii/S0043135420307946	2020	✓	✓	✓	Yes
López-Chau A.; Muñoz-Chávez J.P.; Valle-Cruz D.	Restaurant Quality Perception: A Mixed Analysis with Neural Networks	Estudios Gerenciales	COPE	38	165	https://www.icesi.edu.co/revistas/index.php/estudios_gerenciales/article/view/5235	2022	✓	✓	✓	Yes
López-García P.A.; Argote D.L.; Thrun M.C.	Projection-Based Classification of Chemical Groups for Provenance Analysis of Archaeological Materials	IEEE Access	IEEE	8		https://ieeexplore.ieee.org/document/9165727	2020	✓	✓	✓	Yes
López-Serrano P.M.; Cárdenas-Domínguez J.L.; Corral-Rivas J.J.; Jiménez E.; López-Sánchez C.A.; Vega-Nieva D.J.	Modeling of Aboveground Biomass with Landsat 8 OLI and Machine Learning in Temperate Forests	Forest	MDPI	11	1	https://www.mdpi.com/1999-4907/11/1/11	2020	✓	✓	✓	Yes
Maciel-Nájera J.F.; González-Elizondo M.S.; Hernández-Díaz J.C.; López-Sánchez C.A.; Bailón-Soto C.E.; Carrillo-Parra A.; Wehenkel C.	Influence of Environmental Factors on Forest Understorey Species in Northern Mexico	Forest	MDPI	12	9	https://www.mdpi.com/1999-4907/12/9/1198	2021	✓	✓	✓	Yes
Magallanes-Quintanar R.; Galván-Tejada C.E.; Galván-Tejada J.I.; Méndez-Gallegos S.; Blanco-Macías F.; Valdez-Cepeda R.D.	Artificial Neural Network models for prediction of Standardized Precipitation Index in Central Mexico	Agrociencia	COLPOS	57	1	https://agrociencia-colpos.org/index.php/agrociencia/article/view/2655	2023	✓	✓	✓	Yes
Martínez-Velasco A.; Martínez-Villaseñor L.; Miralles-Pechuán L.; Perez-Ortiz A.C.; Zenteno J.C.; Estrada-Mena F.J.	The Relevance of Cataract as a Risk Factor for Age-Related Macular Degeneration: A Machine Learning Approach	Applied Sciences	MDPI	9	24	https://www.mdpi.com/2076-3417/9/24/5550	2019	✓	✓	✓	Yes
Mejia-Zuluaga P.A.; Dozal L.; Valdivieso-N. J.C.	Genetic Programming Approach for the Detection of Mistletoe Based on UAV Multispectral Imagery in the Conservation Area of Mexico City	Remote Sensing	MDPI	14	3	https://www.mdpi.com/2072-4292/14/3/801	2022	✓	✓	✓	Yes
Morgan-Benita J.A.; Galván-Tejada C.E.; Cruz M.; Galván-Tejada J.I.; Gamboa-Rosales H.; Arceo-Olague J.G.; Luna-García H.; Celaya-Padilla J.M.	Hard Voting Ensemble Approach for the Detection of Type 2 Diabetes in Mexican Population with Non-Glucose Related Features	Healthcare	MDPI	10	8	https://www.mdpi.com/2227-9032/10/8/1362	2022	✓	✓	✓	Yes
Muhammad L.J.; Algehyne E.A.; Usman S.S.; Ahmad A.; Chakraborty C.; Mohammed I.A.	Supervised Machine Learning Models for Prediction of COVID‐19 Infection using Epidemiology Dataset	SN Computer Science	Springer	2		https://link.springer.com/article/10.1007/s42979-020-00394-7	2021	✓	✓	✓	Yes
Niño-Ramírez S.; Jaramillo-Arroyave D.; Ardila O.; Guevara-Casallas L.G.	Reducing the heterogeneity in hepatocellular carcinoma. A cluster analysis based on clinical variables in patients treated at a quaternary care hospital	Revista de Gastroenterología de México	ELSEVIER	86	4	https://www.sciencedirect.com/science/article/pii/S0375090621000112	2021	✕	✓	✓	No
Olguín-Rojas J.C.; Vasquez-Gomez J.I.; López-Canteñs G.J.; Herrera-Lozada J.C.	Classification of apples with Convolutional Neuronal Networks	Revista Fitotecnia Mexicana	Open Journal Systems	45	3	https://revfitotecnia.mx/index.php/RFM/article/view/1374	2022	✓	✓	✓	Yes
Orozco-Ramírez Q.; Lorenzen M.; Fernández de Castro-Martínez G.; Cruz-Ramírez M.A.	Social and Biophysical Factors of the Forest Transition in the UNESCO Mixteca Alta Global Geopark	Investigaciones Geográficas	Instituto de Geografía UNAM		108	http://www.investigacionesgeograficas.unam.mx/index.php/rig/article/view/60531	2022	✓	✓	✓	Yes
Pech-May F.; Aquino-Santos R.; Rios-Toledo G.; Posadas-Durán J.P.F.	Mapping of Land Cover with Optical Images, Supervised Algorithms, and Google Earth Engine	Sensors	MDPI	22	13	https://www.mdpi.com/1424-8220/22/13/4729	2022	✓	✓	✓	Yes
Pérez-Ortega J.; Almanza-Ortega N.N.; Torres-Poveda K.; Martínez-González G.; Zavala-Díaz J.C.; Pazos-Rangel R.	Application of Data Science for Cluster Analysis of COVID-19 Mortality According to Sociodemographic Factors at Municipal Level in Mexico	Mathematics	MDPI	10	13	https://www.mdpi.com/2227-7390/10/13/2167	2022	✓	✓	✓	Yes
Powlen K.A.; Salerno J.; Jones K.W.; Gavin M.C.	Identifying socioeconomic and biophysical factors driving forest loss in protected areas	Conservation Biology	WILEY			https://conbio.onlinelibrary.wiley.com/doi/full/10.1111/cobi.14058?af=R	2023	✓	✓	✓	Yes
Pradhan A.; Prabhu S.; Chadaga K.; Sengupta S.; Nath G.	Supervised Learning Models for the Preliminary Detection of COVID-19 in Patients Using Demographic and Epidemiological Parameters	Information	MDPI	13	7	https://www.mdpi.com/2078-2489/13/7/330	2022	✓	✓	✓	Yes
Prieto K.	Current forecast of COVID-19 in Mexico: A Bayesian and machine learning approaches	PLoS One	PLoS	17	1	https://journals.plos.org/plosone/article?id=10.1371/journal.pone.0259958	2022	✓	✓	✓	Yes
Prieto-Amparán J.A.; Villarreal-Guerrero F.; Martínez-Salvador M.; Manjarrez-Domínguez C.; Vázquez-Quintero G.; Pinedo-Alvarez A.	Spatial near future modeling of land use and land cover changes in the temperate forests of Mexico	PeerJ	PeerJ	7		https://peerj.com/articles/6617/	2019	✓	✓	✓	Yes
Quej V.H.; De las Cruz-Castillo C.; Almorox J.; Rivera-Hernández B.	Evaluation of artificial intelligence models for daily prediction of reference evapotranspiration using temperature, rainfall and relative humidity in a warm sub-humid environment	Italian Journal of Agrometeorology	Firenze University Press	1		Evaluation of artificial intelligence models for daily prediction of reference evapotranspiration using temperature, rainfall and relative humidity in a warm sub-humid environment	2022	✓	✓	✓	Yes
Quintero E.; Thessen A.E.; Arias-Caballero P.; Ayala-Orozco B.	A statistical assessment of population trends for data deficient Mexican amphibians	PeerJ	PeerJ	2		https://peerj.com/articles/703/	2014	✓	✓	✓	Yes
Quiroz-Juárez M.A.; Torres-Gómez A.; Hoyo-Ulloa I.; León-montiel R.J.; U'Ren A.B.	Identification of high-risk COVID-19 patients using machine learning	PLoS One	PLoS	16	9	https://journals.plos.org/plosone/article?id=10.1371/journal.pone.0257234	2021	✓	✓	✓	Yes
Eudave R.R.; Ferreira T.M.; Vicente R.; Lourenco P.B.; Peña F.	Parametric and Machine Learning-Based Analysis of the Seismic Vulnerability of Adobe Historical Buildings Damaged After the September 2017 Mexico Earthquakes	International Journal of Architectural Heritage	Taylor & Francis			https://www.tandfonline.com/doi/full/10.1080/15583058.2023.2200739	2023	✓	✓	✓	Yes
Ramirez-Gonzalez M.; Segundo-Sevilla F.R.; Korba P.; Castellanos-Bustamante R.	Convolutional neural nets with hyperparameter optimization and feature importance for power system static security assessment	Electric Power Systems Research	ELSEVIER	211		https://www.sciencedirect.com/science/article/pii/S0378779622004126	2022	✓	✓	✓	Yes
Ramos-Bernal R.C. et al.	Evaluation of Conditioning Factors of Slope Instability and Continuous Change Maps in the Generation of Landslide Inventory Maps Using Machine Learning (ML) Algorithms	Remote Sensing	MDPI	13	22	https://www.mdpi.com/2072-4292/13/22/4515	2021	✓	✓	✓	Yes
Ramos-Cirilo L.A; Quej-Chi V.H.; Carrillo-Ávila E.; Aceves Navarro E.; Rivera-Hernández B.	Estimation of reference evapotranspiration from temperature data: A comparison between conventional calculation and artificial intelligence techniques in a warm- sub-humid region	Tecnología y Ciencias del Agua	Instituto Mexicano de Tecnología del Agua	12	3	http://www.revistatyca.org.mx/index.php/tyca/article/view/2247	2021	✓	✓	✓	Yes
Rocha-Salazar J.J.; Segovia-Vargas M.J.; Camaho-Miñano M.M.	Money laundering and terrorism financing detection using neural networks and an abnormality indicator	Expert Systems With Applications	ELSEVIER	169		https://www.sciencedirect.com/science/article/pii/S0957417420311209	2021	✓	✓	✓	Yes
Rodriguez-Barrios E.U. et al.	Bayesian Approach to Analyze Reading Comprehension: A Case Study in Elementary School Children in Mexico	Sustainability	MDPI	13	8	https://www.mdpi.com/2071-1050/13/8/4285	2021	✓	✓	✓	Yes
Rojas‐García M.; Vázquez B.; Torres‐Poveda K.; Madrid‐Marina V.	Lethality risk markers by sex and age‐group for COVID‐19 in Mexico: a cross‐sectional study based on machine learning approach	BMC Infectious Diseases	BMC	23		https://bmcinfectdis.biomedcentral.com/articles/10.1186/s12879-022-07951-w	2023	✓	✓	✓	Yes
Rojas-Mendizabal V.; Castillo-Olea C.; Gómez-Siono A.; Zuñiga C.	Assessment of Thoracic Pain Using Machine Learning: A Case Study from Baja California, Mexico	International Journal of Environmental Research and Public Health	MDPI	18	4	https://www.mdpi.com/1660-4601/18/4/2155	2021	✓	✓	✓	Yes
Romero-Sanchez M.E.; Velasco-Garcia M.V.; Perez-Miranda R.; Velasco-Bautista E.; Gonzalez-HernandezA.	Different Modelling Approaches to Determine Suitable Areas for Conserving Egg-Cone Pine (Pinus oocarpa Schiede) Plus Trees in the Central Part of Mexico	Forest	MDPI	13	12	https://www.mdpi.com/1999-4907/13/12/2112	2022	✓	✓	✓	Yes
Salas-Rueda R.A.; Castañeda-Martínez R.	Teachers’ views about mobile devices considering data science	Revista Fuentes	Universidad de Sevilla	3	2	https://revistascientificas.us.es/index.php/fuentes/article/view/12292	2021	✓	✓	✓	Yes
Salas-Rueda R.A.; Ramírez-Ortega J.	Students' perceptions about the use of flipped classroom in the field of electronic electrical engineering	Brazilian Journal of Education, Technology and Society	Cadernos de Educação, Tecnologia e Sociedade	14	1	https://brajets.com/v3/index.php/brajets/article/view/748	2021	✓	✓	✓	Yes
Salas-Rueda R.A.	Perceptions of students about the use of Facebook and Twitter in the educational context through data science and machine learning	Pixel-Bit: Revista de Medios y Educación	Universidad de Sevilla	58		https://idus.us.es/handle/11441/101256	2020	✓	✓	✓	Yes
Salas-Rueda R.A.; Castañeda-Martínez R.; Ramírez-Ortega J.; Gamboa-Rodríguez F.	Analysis on the use of Podcast in the National School of Social Work considering data science and machine learning	Revista Gestión De Las Personas Y Tecnología	USACH	13	37	https://www.revistas.usach.cl/ojs/index.php/revistagpt/article/view/4414	2020	✓	✓	✓	Yes
Salas-Rueda R.A.; Eslava-Cervantes A.L.; Prieto-Larios E.	Teachers’ Perceptions about the Impact of Moodle in the Educational Field Considering Data Science	Online Journal of Communication and Media Technologies		10	4	https://www.ojcmt.net/article/teachers-perceptions-about-the-impact-of-moodle-in-the-educational-field-considering-data-science-8498	2020	✓	✓	✓	Yes
Salas-Rueda R.A.; Castañeda-Martínez R.; Ramírez-Ortega J.; Garcés-Madrigal A.M.	Educators' opinion about technology and web platforms during the Covid-19 pandemic	Revista Gestión De Las Personas Y Tecnología	USACH	14	40	https://www.revistas.usach.cl/ojs/index.php/revistagpt/article/view/4860	2021	✓	✓	✓	Yes
Salas-Rueda R.A.; Jiménez-Bandala C.A.; Alvarado-Zamorano C.	Schoology: plataforma web capaz de mejorar el proceso de enseñanza-aprendizaje en el nivel educativo superior	Revista de Comunicación de la SEECI	SEECI	54		https://www.seeci.net/revista/index.php/seeci/article/view/645	2021	✓	✓	✓	Yes
Salas-Rueda R.A.; Eslava-Cervantes A.L.; Prieto-Larios E.	Analysis of the impact of flipped classroom and technology in the educational process on the Design of Graphic Communication	Vivat Academia. Revista de Comunicación		154		https://www.vivatacademia.net/index.php/vivat/article/view/1238	2021	✓	✓	✓	Yes
Salas-Rueda R.A.; Ramírez-Ortega J.; Eslava-Cervantes A.L	Use of the Collaborative Wall to Improve the Teaching-Learning Conditions in the Bachelor of Visual Arts	Contemporary Educational Technology		13	1	https://www.cedtech.net/article/use-of-the-collaborative-wall-to-improve-the-teaching-learning-conditions-in-the-bachelor-of-visual-8711	2021	✓	✓	✓	Yes
Salas-Rueda R.A.; Castañeda-Martínez R.; Ramírez-Ortega J.; Alvarado-Zamorano C.A.	Analysis about the use of technology in the Clinical Method course during the Covid-19 pandemic considering data science	Digital Education Review		41		https://revistes.ub.edu/index.php/der/article/view/32825	2022	✓	✓	✓	Yes
Salas-Rueda R.A.; Ramírez-Ortega J.; Eslava-Cervantes A.L Castañeda-Martínez R.; De-la-Cruz-Martínez G.	Teachers’ perception of web games and mobile devices at the higher educational level during the COVID-19 pandemic	TextoLivre	UFMG	15		https://periodicos.ufmg.br/index.php/textolivre/article/view/37074	2022	✓	✓	✓	Yes
Salas-Rueda R.A.; Alvarado-Zamorano C.; Ramírez-Ortega J.	Construction of a Web Game for the Teaching-Learning Process of Electronics during the COVID-19 Pandemic	Educational Process: International Journal	ÜNİVERSİTEPARK	11	2	https://edupij.com/index/arsiv/52/258/construction-of-a-web-game-for-the-teaching-learning-process-of-electronics-during-the-covid-19-pandemic	2022	✓	✓	✓	Yes
Salas-Rueda R.A.; Castañeda-Martínez R.; Eslava-Cervantes A.L.; Alvarado-Zamorano C.A.	Teachers’ Perception About MOOCs and ICT During the COVID-19 Pandemic	Contemporary Educational Technology		14	1	https://www.cedtech.net/article/teachers-perception-about-moocs-and-ict-during-the-covid-19-pandemic-11479	2022	✓	✓	✓	Yes
Salas-Rueda R.A.; De-la-Cruz-Martínez G.; Castañeda-Martínez R.; Alvarado-Zamorano C.	Students' perception about the use of LMS platforms and smartphones during the Covid-19 pandemic	Meta: Avaliação		14	43	https://revistas.cesgranrio.org.br/index.php/metaavaliacao/article/view/3661	2022	✓	✓	✓	Yes
Saldana-Pérez M.; Torres-Ruiz M.; Moreno-Ibarra M.	Geospatial Modeling of Road Traffic Using a Semi-Supervised Regression Algorithm	IEEE Access	IEEE	7		https://ieeexplore.ieee.org/document/8845592	2019	✓	✓	✓	Yes
Salvador P.; Gómez D.; Sanz J.; Casanova J.J.	Estimation of Potato Yield Using Satellite Data at a Municipal Level: A Machine Learning Approach	International Journal of Geo-Information	MDPI	9	6	https://www.mdpi.com/2220-9964/9/6/343	2020	✓	✓	✓	Yes
Sánchez-DelaCruz E.; Weber R.; Biswal R.R.; Mejía J.; Hernández-Chan G.; Gómez-Pozos H.	Gait Biomarkers Classification by Combining Assembled Algorithms and Deep Learning: Results of a Local Study	Computational and Mathematical Methods in Medicine	Hindawi	2019		https://www.hindawi.com/journals/cmmm/2019/3515268/	2019	✓	✓	✓	Yes
Schulthess U. et al.	Optimal Sample Size and Composition for Crop Classification with Sen2-Agri’s Random Forest Classifier	Remote Sensing	MDPI	15	3	https://www.mdpi.com/2072-4292/15/3/608	2023	✓	✓	✓	Yes
Servín-Palestina M.; Salazar-Moreno R.; López-Cruz IL.; Medina-García G.; Cid-Ríos J.A.	Prediction of bean production and yields, with artificial neural network models and climate data	Revista de Ciencias Biológicas y de la Salud	Universidad de Sonora	24	2	https://biotecnia.unison.mx/index.php/biotecnia/article/view/1664	2022	✓	✓	✓	Yes
Soto-Murillo M. et al.	Automatic Evaluation of Heart Condition According to the Sounds Emitted and Implementing Six Classification Methods	Healthcare	MDPI	9	3	https://www.mdpi.com/2227-9032/9/3/317	2021	✓	✓	✓	Yes
Tello-Mijare S.; Flores F.	A Novel Method for the Separation of Overlapping Pollen Species for Automated Detection and Classification	Computational and Mathematical Methods in Medicine	Hindawi	2016		https://www.hindawi.com/journals/cmmm/2016/5689346/	2016	✓	✓	✓	Yes
Terán-Bustamante A.; Martínez-Velasco A.; Dávila-Aragón G.	Knowledge Management for Open Innovation: Bayesian Networks through Machine Learning	Journal of Open Innovation: Technology, Market, and Complexity	MDPI	7	1	https://www.mdpi.com/2199-8531/7/1/40	2021	✓	✓	✓	Yes
Terán-Bustamante A.; Martínez-Velasco A.; Castillo-Girón V.M.; Ayala-Ramírez S.	Innovation and Technological Management Model in the Tequila Sector in Mexico	Sustainability	MDPI	14	12	https://www.mdpi.com/2071-1050/14/12/7450	2022	✓	✓	✕	No
Titos M.; Bueno A.; García L.; Benítez C.; Segura J.C.	Classification of Isolated Volcano-Seismic Events Based on Inductive Transfer Learning	IEEE Access	IEEE	17	5	https://ieeexplore.ieee.org/document/8798707	2020	✓	✓	✓	Yes
Torres-Vera M.A.	Mapping of total suspended solids using Landsat imagery and machine learning	International Journal of Environmental Science and Technology	Springer			https://link.springer.com/article/10.1007/s13762-023-04787-y	2023	✓	✓	✓	Yes
Trejo-Alonso J.; Fuentes C.; Chávez C.; Quevedo A.; Gutierrez-Lopez A.; González-Correa B.	Saturated Hydraulic Conductivity Estimation Using Artificial Neural Networks	Water	MDPI	13	5	https://www.mdpi.com/2073-4441/13/5/705	2021	✓	✓	✓	Yes
Urbina-Nájera A.B.; Hernández-Calva J.C.	Reducing stress in technology service company personnel during the COVID-19 pandemic by apply clustering	Revista San Gregorio		50		https://revista.sangregorio.edu.ec/index.php/REVISTASANGREGORIO/article/view/1981	2022	✓	✓	✓	Yes
Urrutia J.E.S.; Villalobos M.A.	An empirical analysis of homicides in Mexico through Machine Learning and statistical design of experiments	Población y Salud en Mesoamérica	Universidad de Costa Rica	20	1	https://www.revistas.ucr.ac.cr/index.php/psm/article/view/48217	2022	✓	✓	✓	Yes
Vargas P.; Moreles M.A.; Peña J.; Monroy A.; Alavez S.	Estimation and SVM classification of glucose-insulin model parameters from OGTT data: a comparison with the ADA criteria	International Journal of Diabetes in Developing Countries	Springer	41		https://link.springer.com/article/10.1007/s13410-020-00851-2	2020	✓	✓	✕	No
Vázquez A. et al.	Innovative Identification of Substance Use Predictors: Machine Learning in a National Sample of Mexican Children	Prevention Science	Springer	21		https://link.springer.com/article/10.1007/s11121-020-01089-4	2020	✓	✓	✓	Yes
Villaseñor E.A.; Arencibia-Jorge R.; Carrillo-Calvet H.	Multiparametric characterization of scientometric performance profiles assisted by neural networks: a study of Mexican higher education institutions	Scientometrics	Springer	110		https://link.springer.com/article/10.1007/s11192-016-2166-0	2017	✓	✓	✕	No
Villegas-Mier C.G.; Rodriguez-Resendiz J.; Álvarez-Alvarado J.M.; Jiménez-Hernández H.; Odry Á.	Optimized Random Forest for Solar Radiation Prediction Using Sunshine Hours	Micromachines	MDPI	13	9	https://www.mdpi.com/2072-666X/13/9/1406	2022	✓	✓	✓	Yes
Zamora-Gutierrez V. et al.	Acoustic identification of Mexican bats based on taxonomic and ecological constraints on call design	Methods in Ecology and Evolution	WILEY	7	9	https://besjournals.onlinelibrary.wiley.com/doi/10.1111/2041-210X.12556	2016	✓	✓	✓	Yes
Zhu L.; Aguilera P.	Evaluating Variations in Tropical Cyclone Precipitation in Eastern Mexico Using Machine Learning Techniques	JGR Atmospheres	WILEY	126	7	https://agupubs.onlinelibrary.wiley.com/doi/full/10.1029/2021JD034604	2021	✓	✓	✓	Yes
Aldana A.; Falcón-Cortés A.; Larralde H.	A machine learning model to identify corruption in México’s public procurement contracts	N/A	N/A			https://arxiv.org/abs/2211.01478v2	2022	✕	✓	✓	No
Appice A.; Gel Y.R.; Iliev I.; Lyubchich V.; Malerba D.	A Multi-Stage Machine Learning Approach to Predict Dengue Incidence: A Case Study in Mexico	IEEE Access	IEEE	8		https://ieeexplore.ieee.org/document/9035432	2020	✓	✓	✓	Yes
Arellano-Verdejo J.; Lazcano-Hernández H.E.; Cabanillas-Terán N.	ERISNet: deep neural network for Sargassum detection along the coastline of the Mexican Caribbean	PeerJ	PeerJ	7		https://peerj.com/articles/6842/	2019	✓	✓	✓	Yes
Bustillos A.; Santiago C.; Rubín G.	Earthquakes Insights and Predictions in Mexico Using Machine Learning	Research in Computing Science	IPN	150	1	https://www.rcs.cic.ipn.mx/rcs/2021_150_11/	2021	✓	✓	✓	Yes
Cantú F.	The Fingerprints of Fraud: Evidence from Mexico’s 1988 Presidential Election	American Political Science Review	Cambridge University Press	113	3	https://www.cambridge.org/core/journals/american-political-science-review/article/fingerprints-of-fraud-evidence-from-mexicos-1988-presidential-election/8F3C1BCA4C53FE85EA48E51321E339E9#	2019	✓	✓	✓	Yes
García-Islas E.I.; Jáuregui G.; Salas-Rodríguez J.; Serranía-Soto F.	Machine Learning in the analysis of lethality and evolution of infection by the SARS-CoV-2 virus (COVID-19) in workers of the Mexico City Metro.	N/A	N/A			https://www.medrxiv.org/content/10.1101/2021.10.27.21265573v1	2021	✕	✓	✓	No
García-Lorenzo M.M. et al.	Knowledge acquisition about the lethality of COVID-19 by using artificial intelligence	Anales de la Academia de Ciencias de Cuba	Academia de Ciencias de Cuba	10	3	https://revistaccuba.sld.cu/index.php/revacc/article/view/891	2020	✓	✓	✕	No
Gomez-Cravioto D.A.; Diaz-Ramos R.E.; Cantu-Ortiz F.J.; Ceballos H.G.	An Exploration and Forecast of COVID-19 in Mexico with Machine Learning	N/A	N/A			https://www.researchsquare.com/article/rs-62035/v1	2020	✕	✓	✓	No
Kerins P.; Guzder-Williams B.; Mackres E.; Rashid T.; Piertraszkiewicz E.	Mapping Urban Land Use in India and Mexico using Remote Sensing and Machine Learning	N/A	N/A			https://www.wri.org/research/mapping-urban-land-use-india-and-mexico-using-remote-sensing-and-machine-learning	2021	✕	✓	✓	No
Newhouse D.; Merfeld J.D.; Ramakrishnan A.P.; Swartz T.; Lahiri P.	Small Area Estimation of Monetary Poverty in Mexico Using Satellite Imagery and Machine Learning	N/A	N/A			https://documents.worldbank.org/en/publication/documents-reports/documentdetail/099430309142231728/idu0660868530404c0414e0bf180797b525682a5	2022	✕	✓	✓	No
Osorio J.; Beltran A.	Enhancing the Detection of Criminal Organizations in Mexico using ML and NLP	IEEE Access	IEEE			https://ieeexplore.ieee.org/document/9207039	2023	✕	✓	✓	No
Poreh D.; Pirasteh S.; Cabral-Cano E.	Assessing subsidence of Mexico City from InSAR and LandSat ETM+ with CGPS and SVM	Geoenvironmental Disasters	Springer	8	7	https://geoenvironmental-disasters.springeropen.com/articles/10.1186/s40677-021-00179-x	2021	✓	✓	✕	No
Rincón R.	Quarterly multidimensional poverty estimates in Mexico using machine learning algorithms	Estudios Económicos	COLMEX	38	1	https://estudioseconomicos.colmex.mx/index.php/economicos/article/view/435	2023	✓	✓	✓	Yes
Saldaña-Pérez M.; Torres-Ruiz M.; Moreno-Ibarra M.	Mexico City Traffic Analysis Based on Social Computing and Machine Learning	N/A	N/A			https://link.springer.com/chapter/10.1007/978-3-030-30809-4_27	2019	✕	✓	✓	No
Zumaya M. et al.	Identifying tax evasion in Mexico with tools from network science and machine learning	N/A	N/A			https://arxiv.org/abs/2104.13353	2021	✕	✓	✓	No
